# Supplementary material
Source: Springer Nature journal article supplement (https://www.springermedizin.de/resource/supplementary/12865_2005_81_MOESM9_ESM.pdf/9428468)

## Normalized Average OT-1 Copy Number in Lung Tissue after Adoptive Transfer of OT-1 CD8+T cells

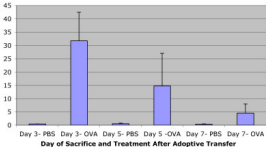

Supplement: MOESM9 [file 9428468]
